# Supplementary material
Source: PubMed Central journal article supplement (PMC2723743)
Supplement: NIHMS116224-supplement-1_si_001.pdf [file NIHMS116224-supplement-1_si_001.pdf]

## Supporting Information

### Roles of Arginine and Lysine Residues in the Translocation of a Cell-Penetrating Peptide from $^{13}\text{C}$ , $^{31}\text{P}$ and $^{19}\text{F}$ Solid-State NMR

Yongchao Su <sup>1</sup>, Tim Doherty <sup>1</sup>, Alan J. Waring <sup>2</sup>, Piotr Ruchala <sup>2</sup>, and Mei Hong <sup>1\*</sup>

<sup>1</sup> Department of Chemistry, Iowa State University, Ames, IA 50011

<sup>2</sup> Department of Medicine, David Geffen School of Medicine, University of California at Los Angeles, California 90095

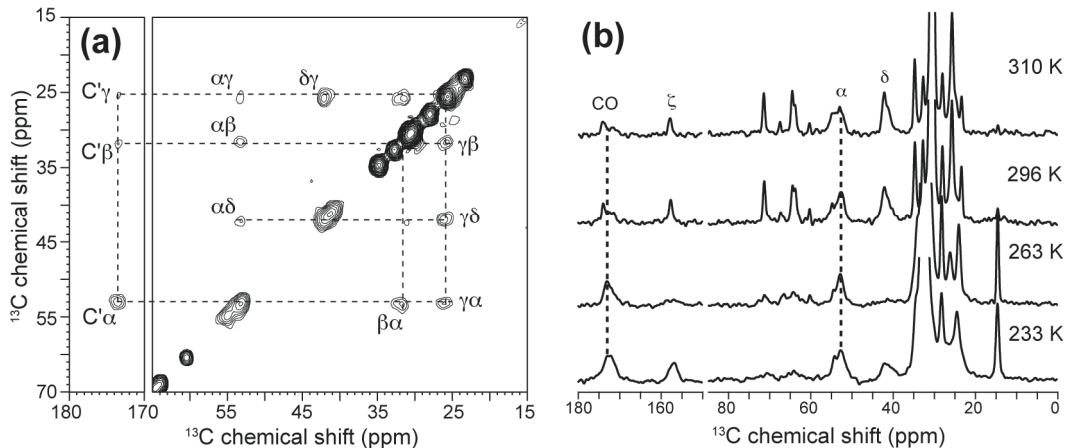

**Figure S1.**  $^{13}\text{C}$  spectra of Arg<sub>10</sub>-labeled penetratin in POPC/POPG (8:7) membranes. (a) 2D  $^{13}\text{C}$ - $^{13}\text{C}$  DARR spectra measured at 303 K. (b) Temperature-dependent 1D  $^{13}\text{C}$  CP-MAS spectra.

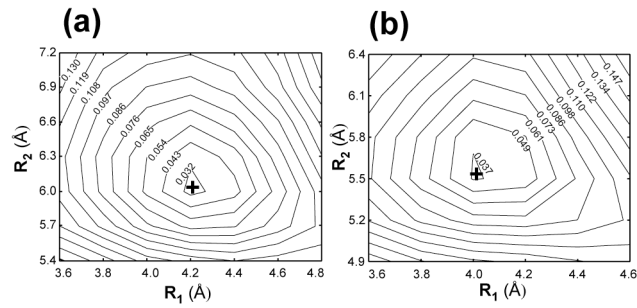

**Figure S2.** Root-mean-square deviations between the calculated and experimental  $^{13}\text{C}$ - $^{31}\text{P}$  REDOR intensities. (a) Arg<sub>10</sub> C $\zeta$ . (b) Lys<sub>13</sub> C $\epsilon$ . The REDOR curve fitting used a combination of a short distance ( $R_1$ ) and a long distance ( $R_2$ ) at a 1:1 ratio. Best-fits are 6.0 Å and 4.2 Å for Arg<sub>10</sub> C $\zeta$  (minimum RMSD = 0.029), and 5.5 Å and 4.0 Å for Lys<sub>13</sub> C $\epsilon$  (minimum RMSD = 0.036).

**Table S1.**  $^{13}\text{C}$  chemical shifts of penetratin Arg<sub>10</sub> in DMPC/DMPG (8:7) at 303 K and 243 K, and in POPC/POPG (8:7) at 303 K.

| Site       | DMPC/DMPG |       | POPC/POPG |
|------------|-----------|-------|-----------|
|            | 303 K     | 234 K | 303 K     |
| CO         | 173.4     | 173.0 | 173.5     |
| C $\alpha$ | 53.2      | 52.7  | 53.3      |
| C $\beta$  | 31.5      | 31.3  | 31.9      |
| C $\gamma$ | 25.8      | 25.0  | 25.9      |
| C $\delta$ | 42.2      | 41.5  | 42.1      |
| C $\zeta$  | 157.8     | 157.0 | 157.8     |
